# Supplementary material for: Information Behavior on Video on Demand Services: User Motives and Their Selection Criteria for Content
Source: MDPI journal article supplement (doi:10.3390/info12040173), 2021-04-16
Supplement: s1 [file s1]

Archive with 1 entries (1 files):
- information-1169131-supplementary.pdf
